# Supplementary material for: Interaction of N-acetylcysteine with DPPC liposomes at different pH: a physicochemical study
Source: Royal Society of Chemistry journal article supplement (doi:10.1039/c9nj06167c), 2020-01-01
Supplement: c9nj06167c1.pdf [file c9nj06167c1.pdf]

**Interaction of N-acetylcysteine with DPPC liposomes at different pH:  
a physicochemical study**

Juan Marcelo Arias<sup>1</sup>, Rafael A. Cobos Picot<sup>1</sup>, María Eugenia Tuttolomondo<sup>1</sup>, Aida Ben Altabef<sup>1\*</sup> and Sonia Beatriz Díaz<sup>1\*</sup>

<sup>1</sup>INQUINOA-CONICET, Cátedra de Fisicoquímica I, Instituto de Química Física, Facultad de Bioquímica, Química y Farmacia, Universidad Nacional de Tucumán, San Lorenzo 456, T4000CAN S. M. de Tucumán, R. Argentina.

**Supporting Information**

**Table S1.** Effect of NAC on the CH<sub>2</sub>, CH<sub>3</sub> vibrational bands and CH<sub>2</sub> deformation band in gel (A) and liquid crystalline phase (B), at pH 2 and at 30 °C and 50 °C respectively by FTIR measurements.

(A)

| <b>NAC:DPPC<br/>Molar ratio<br/>(30 °C)</b> | <b><math>\nu_a</math> CH<sub>3</sub><br/>/cm<sup>-1</sup></b> | <b><math>\Delta\nu</math><br/>/cm<sup>-1</sup></b> | <b><math>\nu_s</math> CH<sub>3</sub><br/>/cm<sup>-1</sup></b> | <b><math>\Delta\nu</math><br/>/cm<sup>-1</sup></b> | <b><math>\nu_a</math> CH<sub>2</sub><br/>/cm<sup>-1</sup></b> | <b><math>\Delta\nu</math><br/>/cm<sup>-1</sup></b> | <b><math>\nu_s</math> CH<sub>2</sub><br/>/cm<sup>-1</sup></b> | <b><math>\Delta\nu</math><br/>/cm<sup>-1</sup></b> | <b><math>\delta_s</math> CH<sub>2</sub><br/>/cm<sup>-1</sup></b> | <b><math>\Delta\delta</math><br/>/cm<sup>-1</sup></b> |
|---------------------------------------------|---------------------------------------------------------------|----------------------------------------------------|---------------------------------------------------------------|----------------------------------------------------|---------------------------------------------------------------|----------------------------------------------------|---------------------------------------------------------------|----------------------------------------------------|------------------------------------------------------------------|-------------------------------------------------------|
| <b>0.00:1.0</b>                             | <b>2956</b>                                                   | <b>0.0</b>                                         | <b>2873</b>                                                   | <b>0.0</b>                                         | <b>2919</b>                                                   | <b>0.0</b>                                         | <b>2850</b>                                                   | <b>0.0</b>                                         | <b>1468</b>                                                      | <b>0.0</b>                                            |
| <b>0.37:1.0</b>                             | 2957                                                          | 0.6                                                | 2875                                                          | 2.6                                                | 2919                                                          | 0.1                                                | 2851                                                          | 0.1                                                | 1468                                                             | 0.2                                                   |
| <b>1.10:1.0</b>                             | 2957                                                          | 0.5                                                | 2873                                                          | 0.4                                                | 2919                                                          | -0.1                                               | 2851                                                          | 0.2                                                | 1468                                                             | -0.1                                                  |
| <b>1.47:1.0</b>                             | 2957                                                          | 1.3                                                | 2873                                                          | 0.5                                                | 2918                                                          | -0.4                                               | 2851                                                          | 0.4                                                | 1468                                                             | 0.2                                                   |
| <b>2.93:1.0</b>                             | 2957                                                          | 0.8                                                | 2874                                                          | 1.1                                                | 2919                                                          | 0.0                                                | 2851                                                          | 0.2                                                | 1468                                                             | 0.1                                                   |

(B)

| <b>NAC:DPPC<br/>Molar ratio<br/>(50 °C)</b> | <b><math>\nu_a</math> CH<sub>3</sub><br/>/cm<sup>-1</sup></b> | <b><math>\Delta\nu</math><br/>/cm<sup>-1</sup></b> | <b><math>\nu_s</math> CH<sub>3</sub><br/>/cm<sup>-1</sup></b> | <b><math>\Delta\nu</math><br/>/cm<sup>-1</sup></b> | <b><math>\nu_a</math> CH<sub>2</sub><br/>/cm<sup>-1</sup></b> | <b><math>\Delta\nu</math><br/>/cm<sup>-1</sup></b> | <b><math>\nu_s</math> CH<sub>2</sub><br/>/cm<sup>-1</sup></b> | <b><math>\Delta\nu</math><br/>/cm<sup>-1</sup></b> | <b><math>\delta_s</math> CH<sub>2</sub><br/>/cm<sup>-1</sup></b> | <b><math>\Delta\delta</math><br/>/cm<sup>-1</sup></b> |
|---------------------------------------------|---------------------------------------------------------------|----------------------------------------------------|---------------------------------------------------------------|----------------------------------------------------|---------------------------------------------------------------|----------------------------------------------------|---------------------------------------------------------------|----------------------------------------------------|------------------------------------------------------------------|-------------------------------------------------------|
| <b>0.00:1.0</b>                             | <b>2956</b>                                                   | <b>0.0</b>                                         | <b>2874</b>                                                   | <b>0.0</b>                                         | <b>2923</b>                                                   | <b>0.0</b>                                         | <b>2853</b>                                                   | <b>0.0</b>                                         | <b>1468</b>                                                      | <b>0.0</b>                                            |
| <b>0.37:1.0</b>                             | 2958                                                          | 1.3                                                | 2873                                                          | -0.4                                               | 2923                                                          | -0.3                                               | 2853                                                          | -0.1                                               | 1468                                                             | 0.5                                                   |
| <b>1.10:1.0</b>                             | 2958                                                          | 1.7                                                | 2874                                                          | 0.5                                                | 2923                                                          | 0.2                                                | 2852                                                          | -1.1                                               | 1468                                                             | -0.4                                                  |
| <b>1.47:1.0</b>                             | 2958                                                          | 1.7                                                | 2873                                                          | -0.5                                               | 2923                                                          | 0.0                                                | 2853                                                          | 0.0                                                | 1467                                                             | -0.8                                                  |
| <b>2.93:1.0</b>                             | 2958                                                          | 1.4                                                | 2873                                                          | 0.0                                                | 2923                                                          | -0.1                                               | 2853                                                          | -0.2                                               | 1467                                                             | -0.5                                                  |

**Table S2.** Effect of NAC on the CH<sub>2</sub>, CH<sub>3</sub> vibrational bands and CH<sub>2</sub> deformation band in gel (A) and liquid crystalline phase (B), at pH 7 and at 30 °C and 50 °C respectively by FTIR measurements.

(A)

| <b>NAC:DPPC<br/>Molar ratio<br/>(30 °C)</b> | <b><math>\nu_a</math> CH<sub>3</sub><br/>/cm<sup>-1</sup></b> | <b><math>\Delta\nu</math><br/>/cm<sup>-1</sup></b> | <b><math>\nu_s</math> CH<sub>3</sub><br/>/cm<sup>-1</sup></b> | <b><math>\Delta\nu</math><br/>/cm<sup>-1</sup></b> | <b><math>\nu_a</math> CH<sub>2</sub><br/>/cm<sup>-1</sup></b> | <b><math>\Delta\nu</math><br/>/cm<sup>-1</sup></b> | <b><math>\nu_s</math> CH<sub>2</sub><br/>/cm<sup>-1</sup></b> | <b><math>\Delta\nu</math><br/>/cm<sup>-1</sup></b> | <b><math>\delta_s</math> CH<sub>2</sub><br/>/cm<sup>-1</sup></b> | <b><math>\Delta\delta</math><br/>/cm<sup>-1</sup></b> |
|---------------------------------------------|---------------------------------------------------------------|----------------------------------------------------|---------------------------------------------------------------|----------------------------------------------------|---------------------------------------------------------------|----------------------------------------------------|---------------------------------------------------------------|----------------------------------------------------|------------------------------------------------------------------|-------------------------------------------------------|
| <b>0.00:1.0</b>                             | <b>2956</b>                                                   | <b>0</b>                                           | <b>2873</b>                                                   | <b>0</b>                                           | <b>2919</b>                                                   | <b>0</b>                                           | <b>2850</b>                                                   | <b>0</b>                                           | <b>1468</b>                                                      | <b>0</b>                                              |
| <b>0.37:1.0</b>                             | 2957                                                          | 1                                                  | 2874                                                          | 1                                                  | 2918                                                          | -1                                                 | 2850                                                          | 0                                                  | 1468                                                             | 0                                                     |
| <b>1.10:1.0</b>                             | 2957                                                          | 1                                                  | 2873                                                          | 0                                                  | 2919                                                          | 0                                                  | 2851                                                          | 1                                                  | 1468                                                             | 0                                                     |
| <b>1.47:1.0</b>                             | 2956                                                          | 0                                                  | 2872                                                          | -1                                                 | 2919                                                          | 0                                                  | 2851                                                          | 1                                                  | 1469                                                             | 1                                                     |
| <b>2.93:1.0</b>                             | 2957                                                          | 1                                                  | 2874                                                          | 1                                                  | 2919                                                          | 0                                                  | 2851                                                          | 1                                                  | 1468                                                             | 0                                                     |

(B)

| <b>NAC:DPPC<br/>Molar ratio<br/>(50 °C)</b> | <b><math>\nu_a</math> CH<sub>3</sub><br/>/cm<sup>-1</sup></b> | <b><math>\Delta\nu</math><br/>/cm<sup>-1</sup></b> | <b><math>\nu_s</math> CH<sub>3</sub><br/>/cm<sup>-1</sup></b> | <b><math>\Delta\nu</math><br/>/cm<sup>-1</sup></b> | <b><math>\nu_a</math> CH<sub>2</sub><br/>/cm<sup>-1</sup></b> | <b><math>\Delta\nu</math><br/>/cm<sup>-1</sup></b> | <b><math>\nu_s</math> CH<sub>2</sub><br/>/cm<sup>-1</sup></b> | <b><math>\Delta\nu</math><br/>/cm<sup>-1</sup></b> | <b><math>\delta_s</math> CH<sub>2</sub><br/>/cm<sup>-1</sup></b> | <b><math>\Delta\delta</math><br/>/cm<sup>-1</sup></b> |
|---------------------------------------------|---------------------------------------------------------------|----------------------------------------------------|---------------------------------------------------------------|----------------------------------------------------|---------------------------------------------------------------|----------------------------------------------------|---------------------------------------------------------------|----------------------------------------------------|------------------------------------------------------------------|-------------------------------------------------------|
| <b>0.00:1.0</b>                             | <b>2956</b>                                                   | <b>0</b>                                           | <b>2874</b>                                                   | <b>0</b>                                           | <b>2923</b>                                                   | <b>0</b>                                           | <b>2853</b>                                                   | <b>0</b>                                           | <b>1468</b>                                                      | <b>0</b>                                              |
| <b>0.37:1.0</b>                             | 2958                                                          | 2                                                  | 2874                                                          | 0                                                  | 2923                                                          | 0                                                  | 2853                                                          | 0                                                  | 1467                                                             | -1                                                    |
| <b>1.10:1.0</b>                             | 2957                                                          | 1                                                  | 2873                                                          | -1                                                 | 2921                                                          | 2                                                  | 2853                                                          | 0                                                  | 1467                                                             | -1                                                    |
| <b>1.47:1.0</b>                             | 2957                                                          | 1                                                  | 2873                                                          | -1                                                 | 2923                                                          | 0                                                  | 2853                                                          | 0                                                  | 1467                                                             | -1                                                    |
| <b>2.93:1.0</b>                             | 2957                                                          | 1                                                  | 2872                                                          | -2                                                 | 2922                                                          | -1                                                 | 2852                                                          | 0                                                  | 1467                                                             | -1                                                    |

**Table S3.** Bandwidth of the CH<sub>2</sub> antisymmetric and symmetric stretching modes as a function of the molar ratio of NAC: DPPC in gel and liquid crystalline states.

pH 2

| NAC:DPPC<br>Molar ratio | Band width at 30 °C     |                         | Band width at 50 °C     |                         |
|-------------------------|-------------------------|-------------------------|-------------------------|-------------------------|
|                         | $\nu_a$ CH <sub>2</sub> | $\nu_s$ CH <sub>2</sub> | $\nu_a$ CH <sub>2</sub> | $\nu_s$ CH <sub>2</sub> |
| <b>0.00:1.0</b>         | 19                      | 11                      | 24                      | 14                      |
| <b>0.37:1.0</b>         | 16                      | 9                       | 22                      | 12                      |
| <b>1.10:1.0</b>         | 18                      | 10                      | 22                      | 13                      |
| <b>1.47:1.0</b>         | 17                      | 10                      | 23                      | 14                      |
| <b>2.93:1.0</b>         | 16                      | 10                      | 21                      | 13                      |

pH 7

| NAC:DPPC<br>Molar ratio | Band width at 30 °C     |                         | Band width at 50 °C     |                         |
|-------------------------|-------------------------|-------------------------|-------------------------|-------------------------|
|                         | $\nu_a$ CH <sub>2</sub> | $\nu_s$ CH <sub>2</sub> | $\nu_a$ CH <sub>2</sub> | $\nu_s$ CH <sub>2</sub> |
| <b>0.00:1.0</b>         | 19                      | 11                      | 24                      | 14                      |
| <b>0.37:1.0</b>         | <b>18</b>               | <b>11</b>               | <b>24</b>               | <b>15</b>               |
| <b>1.10:1.0</b>         | <b>19</b>               | <b>11</b>               | <b>24</b>               | <b>15</b>               |
| <b>1.47:1.0</b>         | <b>19</b>               | <b>12</b>               | <b>24</b>               | <b>15</b>               |
| <b>2.93:1.0</b>         | <b>19</b>               | <b>12</b>               | <b>24</b>               | <b>15</b>               |



**Table S5.** Intensity ratio of the bands corresponding to the stretching methyl, methylene and carbon-carbon, as a function of the molar ratio of NAC:DPPC in gel state, at pH 2 and 7.

**pH 2**

| <b>NAC:DPPC<br/>Molar ratio</b> | <b>I<sub>2885</sub>/I<sub>2851</sub></b> | <b>I<sub>1099</sub>/I<sub>1066</sub></b> | <b>I<sub>2935</sub>/I<sub>2851</sub></b> |
|---------------------------------|------------------------------------------|------------------------------------------|------------------------------------------|
| <b>0.00:1.0</b>                 | 1.1                                      | 0.6                                      | 0.5                                      |
| <b>0.37:1.0</b>                 | 1.2                                      | 0.6                                      | 0.5                                      |
| <b>1.10:1.0</b>                 | 1.2                                      | 0.6                                      | 0.5                                      |
| <b>1.47:1.0</b>                 | 1.2                                      | 0.6                                      | 0.5                                      |
| <b>2.93:1.0</b>                 | 1.2                                      | 0.5                                      | 0.6                                      |

**pH 7**

| <b>NAC:DPPC<br/>Molar ratio</b> | <b>I<sub>2885</sub>/I<sub>2851</sub></b> | <b>I<sub>1099</sub>/I<sub>1066</sub></b> | <b>I<sub>2935</sub>/I<sub>2851</sub></b> |
|---------------------------------|------------------------------------------|------------------------------------------|------------------------------------------|
| <b>0.00:1.0</b>                 | 1.18                                     | 0.45                                     | 0.30                                     |
| <b>0.37:1.0</b>                 | 1.14                                     | 0.55                                     | 0.52                                     |
| <b>1.10:1.0</b>                 | 1.10                                     | 0.58                                     | 0.80                                     |
| <b>1.47:1.0</b>                 | 1.12                                     | 0.56                                     | 0.75                                     |
| <b>2.93:1.0</b>                 | 1.2                                      | 0.5                                      | 0.6                                      |

**Table S6.** C=O stretching mode by FTIR measurements in gel (30°C) and liquid crystalline (50°C) states.

| <b>pH 2</b>                                 |                                           |                                           |                                            |                                           |                                           |
|---------------------------------------------|-------------------------------------------|-------------------------------------------|--------------------------------------------|-------------------------------------------|-------------------------------------------|
| <b>NAC:DPPC<br/>Molar ratio /<br/>30 °C</b> | <b><math>\nu</math> CO<sub>bond</sub></b> | <b><math>\nu</math> CO<sub>free</sub></b> | <b>NAC:DPPC<br/>Molar ratio /<br/>50°C</b> | <b><math>\nu</math> CO<sub>bond</sub></b> | <b><math>\nu</math> CO<sub>free</sub></b> |
| <b>0.00:1.0</b>                             | 1739                                      | 1731                                      | <b>0.00:1.0</b>                            | 1741                                      | 1730                                      |
| <b>0.37:1.0</b>                             | 1744                                      | 1732                                      | <b>0.37:1.0</b>                            | 1746                                      | 1733                                      |
| <b>1.10:1.0</b>                             | 1743                                      | 1732                                      | <b>1.10:1.0</b>                            | 1745                                      | 1732                                      |
| <b>1.47:1.0</b>                             | 1743                                      | 1731                                      | <b>1.47:1.0</b>                            | 1745                                      | 1730                                      |
| <b>2.93:1.0</b>                             | 1744                                      | 1731                                      | <b>2.93:1.0</b>                            | 1745                                      | 1731                                      |

| <b>pH 7</b>                                 |                                           |                                           |                                            |                                           |                                           |
|---------------------------------------------|-------------------------------------------|-------------------------------------------|--------------------------------------------|-------------------------------------------|-------------------------------------------|
| <b>NAC:DPPC<br/>Molar ratio /<br/>30 °C</b> | <b><math>\nu</math> CO<sub>bond</sub></b> | <b><math>\nu</math> CO<sub>free</sub></b> | <b>NAC:DPPC<br/>Molar ratio /<br/>50°C</b> | <b><math>\nu</math> CO<sub>bond</sub></b> | <b><math>\nu</math> CO<sub>free</sub></b> |
| <b>0.00:1.0</b>                             | 1739                                      | 1731                                      | <b>0.00:1.0</b>                            | 1741                                      | 1730                                      |
| <b>0.37:1.0</b>                             | 1743                                      | 1732                                      | <b>0.37:1.0</b>                            | 1745                                      | 1732                                      |
| <b>1.10:1.0</b>                             | 1744                                      | 1732                                      | <b>1.10:1.0</b>                            | 1743                                      | 1734                                      |
| <b>1.47:1.0</b>                             | 1744                                      | 1733                                      | <b>1.47:1.0</b>                            | 1745                                      | 1734                                      |
| <b>2.93:1.0</b>                             | 1744                                      | 1733                                      | <b>2.93:1.0</b>                            | 1743                                      | 1732                                      |

**Table S7.** Effect of NAC on the C=O stretching mode by FTIR measurements in gel (30°C) and liquid crystalline (50°C) states.

|                                            | pH 2                           |                                | pH 7                              |                                |
|--------------------------------------------|--------------------------------|--------------------------------|-----------------------------------|--------------------------------|
| <b>NAC:DPPC<br/>Molar ratio /<br/>30°C</b> | $\Delta\nu$ CO <sub>bond</sub> | $\Delta\nu$ CO <sub>free</sub> | $\Delta\nu$<br>CO <sub>bond</sub> | $\Delta\nu$ CO <sub>free</sub> |
| <b>0.00:1.0</b>                            | 0                              | 0                              | 0                                 | 0                              |
| <b>0.37:1.0</b>                            | 5                              | 1                              | 4                                 | 1                              |
| <b>1.10:1.0</b>                            | 4                              | 1                              | 5                                 | 1                              |
| <b>1.47:1.0</b>                            | 4                              | 0                              | 5                                 | 2                              |
| <b>2.93:1.0</b>                            | 5                              | 0                              | 5                                 | 2                              |
| <b>NAC:DPPC<br/>Molar ratio /<br/>50°C</b> | $\Delta\nu$ CO <sub>bond</sub> | $\Delta\nu$ CO <sub>free</sub> | $\Delta\nu$<br>CO <sub>bond</sub> | $\Delta\nu$ CO <sub>free</sub> |
| <b>0.00:1.0</b>                            | 0                              | 0                              | 0                                 | 0                              |
| <b>0.37:1.0</b>                            | 5                              | 3                              | 3                                 | 2                              |
| <b>1.10:1.0</b>                            | 4                              | 2                              | 2                                 | 4                              |
| <b>1.47:1.0</b>                            | 4                              | 0                              | 3                                 | 4                              |
| <b>2.93:1.0</b>                            | 4                              | 1                              | 2                                 | 2                              |



**Table S8.**  $\text{PO}_2^-$  stretching mode by FTIR measurements and effect of NAC on the  $\text{PO}_2^-$  stretching modes in gel (30°C) and liquid crystalline (50°C) states.

**pH 2**

| <b>NAC:DPPC<br/>Molar ratio<br/>30°C</b>  | <b><math>\nu_a \text{PO}_2^-</math></b> | <b><math>\nu_a \text{PO}_2^-</math></b> | <b><math>\nu_s \text{PO}_2^-</math></b> | <b><math>\nu_s \text{PO}_2^-</math></b> |
|-------------------------------------------|-----------------------------------------|-----------------------------------------|-----------------------------------------|-----------------------------------------|
| <b>0.00:1.00</b>                          | 1228                                    | 0                                       | 1089                                    | 0                                       |
| <b>0.37:1.00</b>                          | 1232                                    | 4                                       | 1090                                    | 1                                       |
| <b>1.10:1.00</b>                          | 1232                                    | 4                                       | 1091                                    | 2                                       |
| <b>1.47:1.00</b>                          | 1232                                    | 4                                       | 1091                                    | 2                                       |
| <b>2.93:1.00</b>                          | 1234                                    | 4                                       | 1090                                    | 1                                       |
| <b>NAC:DPPC<br/>Molar Ratio<br/>50 °C</b> | <b><math>\nu_a \text{PO}_2^-</math></b> | <b><math>\nu_a \text{PO}_2^-</math></b> | <b><math>\nu_s \text{PO}_2^-</math></b> | <b><math>\nu_s \text{PO}_2^-</math></b> |
| <b>0.00:1.00</b>                          | 1232                                    | 0                                       | 1088                                    | 0                                       |
| <b>0.37:1.00</b>                          | 1232                                    | 0                                       | 1088                                    | 0                                       |
| <b>1.10:1.00</b>                          | 1232                                    | 0                                       | 1089                                    | 1                                       |
| <b>1.47:1.00</b>                          | 1232                                    | 0                                       | 1089                                    | 1                                       |
| <b>2.93:1.00</b>                          | 1233                                    | 1                                       | 1089                                    | 1                                       |

**pH 7**

| <b>NAC:DPPC<br/>Molar ratio<br/>30°C</b>  | <b><math>\nu_a \text{PO}_2^-</math></b> | <b><math>\nu_a \text{PO}_2^-</math></b> | <b><math>\nu_s \text{PO}_2^-</math></b> | <b><math>\nu_s \text{PO}_2^-</math></b> |
|-------------------------------------------|-----------------------------------------|-----------------------------------------|-----------------------------------------|-----------------------------------------|
| <b>0.00:1.00</b>                          | 1228                                    | 0                                       | 1089                                    | 0                                       |
| <b>0.37:1.00</b>                          | 1226                                    | -2                                      | 1089                                    | 1                                       |
| <b>1.10:1.00</b>                          | 1234                                    | 6                                       | 1090                                    | 1                                       |
| <b>1.47:1.00</b>                          | 1234                                    | 6                                       | 1090                                    | 1                                       |
| <b>2.93:1.00</b>                          | 1235                                    | 7                                       | 1091                                    | 2                                       |
| <b>NAC:DPPC<br/>Molar ratio<br/>50 °C</b> | <b><math>\nu_a \text{PO}_2^-</math></b> | <b><math>\nu_a \text{PO}_2^-</math></b> | <b><math>\nu_s \text{PO}_2^-</math></b> | <b><math>\nu_s \text{PO}_2^-</math></b> |
| <b>0.00:1.00</b>                          | 1232                                    | 0                                       | 1088                                    | 0                                       |
| <b>0.37:1.00</b>                          | 1232                                    | 0                                       | 1088                                    | 0                                       |
| <b>1.10:1.00</b>                          | 1234                                    | 2                                       | 1089                                    | 1                                       |
| <b>1.47:1.00</b>                          | 1234                                    | 2                                       | 1089                                    | 1                                       |
| <b>2.93:1.00</b>                          | 1236                                    | 4                                       | 1089                                    | 1                                       |

**Table S9.** PO<sub>2</sub><sup>-</sup> stretching mode by FTIR measurements and effect of NAC on the PO<sub>2</sub><sup>-</sup> stretching modes.

| <b>Molar ratio<br/>NAC: DPPC</b> | <b>pH 2</b>    |                | <b>pH 7</b>    |                |
|----------------------------------|----------------|----------------|----------------|----------------|
|                                  | T <sub>p</sub> | T <sub>m</sub> | T <sub>p</sub> | T <sub>m</sub> |
| <b>0.00:1.00</b>                 | 36.3           | 41.00          | 36.3           | 41.10          |
| <b>0.37:1.00</b>                 | 35.88          | 42.84          | 34.86          | 39.60          |
| <b>1.10:1.00</b>                 | 32.16          | 41.93          | 36.52          | 45.40          |
| <b>1.47:1.00</b>                 | 32.16          | 42.88          | 37.33          | 43.74          |
| <b>2.93:1.00</b>                 | 30.00          | 41.93          | 38.18          | 43.73          |

**Table S10.** Calorimetric parameters analyzed for the different samples studied;  $T_m$ : transition temperature;  $\Delta H_{cal}$ : transition enthalpy;  $\Delta T_{1/2}$ : mean height width of the principal transition;  $T_p$ : pretransition temperature and  $\Delta H_{Tp}$ : pretransition enthalpy.

| pH 2                            |                                                             |                                                                                    |                                                                          |                                                                        |                                                             |                                                                                   |                                                                               |             |
|---------------------------------|-------------------------------------------------------------|------------------------------------------------------------------------------------|--------------------------------------------------------------------------|------------------------------------------------------------------------|-------------------------------------------------------------|-----------------------------------------------------------------------------------|-------------------------------------------------------------------------------|-------------|
| <b>NAC:DPPC<br/>Molar ratio</b> | <b><math>T_m /</math><br/><math>^{\circ}\text{C}</math></b> | <b><math>\Delta H_{cal} /</math><br/><math>\text{J}\cdot\text{mol}^{-1}</math></b> | <b><math>\Delta S / \text{J}</math><br/><math>\text{mol}^{-1}</math></b> | <b><math>\Delta T_{1/2} /</math><br/><math>^{\circ}\text{C}</math></b> | <b><math>T_p /</math><br/><math>^{\circ}\text{C}</math></b> | <b><math>\Delta H_{Tp} /</math><br/><math>\text{J}\cdot\text{mol}^{-1}</math></b> | <b><math>\Delta H_{vH} / \text{J}</math><br/><math>\text{mol}^{-1}</math></b> | <b>C.U.</b> |
| <b>0,00:1,0</b>                 | 41.53                                                       | 10174.20                                                                           | 32.35                                                                    | 0.70                                                                   | 36.17                                                       | 2571.39                                                                           | 81900.55                                                                      | 8.05        |
| <b>0,37:1,0</b>                 | 42.30                                                       | 33003.31                                                                           | 104.67                                                                   | 0.96                                                                   | 35.74                                                       | 1472.12                                                                           | 61954.17                                                                      | 1.88        |
| <b>1,10:1,0</b>                 | 42.09                                                       | 34745.19                                                                           | 110.27                                                                   | 1.77                                                                   | 32.26                                                       | 1106.48                                                                           | 33269.45                                                                      | 1.49        |
| <b>1,47:1,0</b>                 | 41.75                                                       | 36891.34                                                                           | 117.21                                                                   | 1.77                                                                   | 32.22                                                       | 774.07                                                                            | 32734.12                                                                      | 0.96        |
| <b>2,93:1,0</b>                 | 41.40                                                       | 34908.68                                                                           | 111.03                                                                   | 2.35                                                                   | 29.93                                                       | 311.95                                                                            | 24243.42                                                                      | 0.89        |

| pH 7                            |                                                             |                                                                                    |                                                                          |                                                                        |                                                             |                                                                                   |                                                                               |             |
|---------------------------------|-------------------------------------------------------------|------------------------------------------------------------------------------------|--------------------------------------------------------------------------|------------------------------------------------------------------------|-------------------------------------------------------------|-----------------------------------------------------------------------------------|-------------------------------------------------------------------------------|-------------|
| <b>Molar ratio<br/>NAC:DPPC</b> | <b><math>T_m /</math><br/><math>^{\circ}\text{C}</math></b> | <b><math>\Delta H_{cal} /</math><br/><math>\text{J}\cdot\text{mol}^{-1}</math></b> | <b><math>\Delta S / \text{J}</math><br/><math>\text{mol}^{-1}</math></b> | <b><math>\Delta T_{1/2} /</math><br/><math>^{\circ}\text{C}</math></b> | <b><math>T_p /</math><br/><math>^{\circ}\text{C}</math></b> | <b><math>\Delta H_{Tp} /</math><br/><math>\text{J}\cdot\text{mol}^{-1}</math></b> | <b><math>\Delta H_{vH} / \text{J}</math><br/><math>\text{mol}^{-1}</math></b> | <b>C.U.</b> |
| <b>0,00:1,0</b>                 | 41.53                                                       | 10186.43                                                                           | 32,35                                                                    | 0.7                                                                    | 36.17                                                       | 2571.39                                                                           | 81900.55                                                                      | 8.05        |
| <b>0,37:1,0</b>                 | 41.49                                                       | 24648.74                                                                           | 78,38                                                                    | 1.46                                                                   | 34.92                                                       | 2697.53                                                                           | 39191.78                                                                      | 1.59        |
| <b>1,10:1,0</b>                 | 42.25                                                       | 24625.48                                                                           | 78,11                                                                    | 1.05                                                                   | 37.1                                                        | 2203.15                                                                           | 56509.98                                                                      | 2.29        |
| <b>1,47:1,0</b>                 | 42.52                                                       | 26179.45                                                                           | 82,97                                                                    | 0.82                                                                   | 38.05                                                       | 4675.92                                                                           | 73288.14                                                                      | 2.80        |
| <b>2,93:1,0</b>                 | 42.42                                                       | 28730.70                                                                           | 91,09                                                                    | 1                                                                      | 37.41                                                       | 5832.88                                                                           | 59813.93                                                                      | 2.08        |

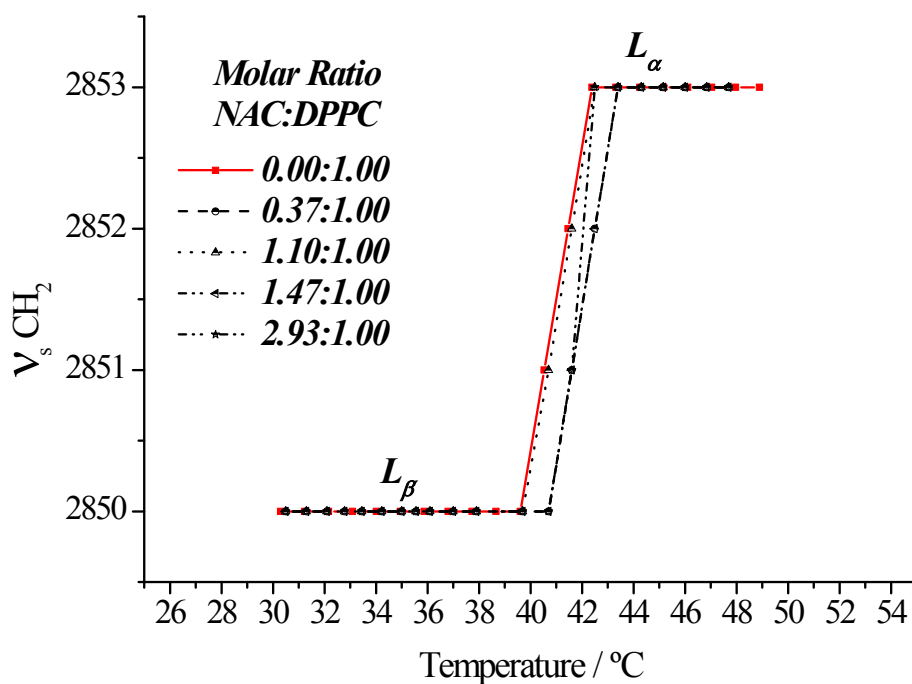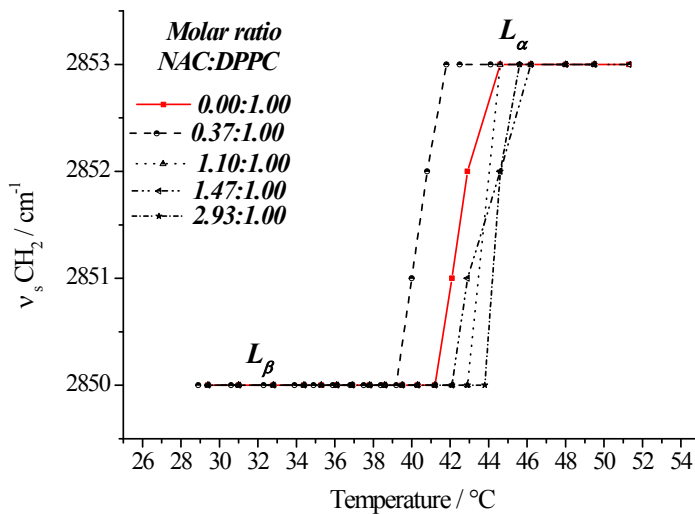

**Figure S1.** Changes in the wavenumber of the  $\text{CH}_2$  symmetric stretching in NAC:DPPC (at different molar ratios) liposomes as a function of the temperature (at pH 2 (upper) and 7 (down)).

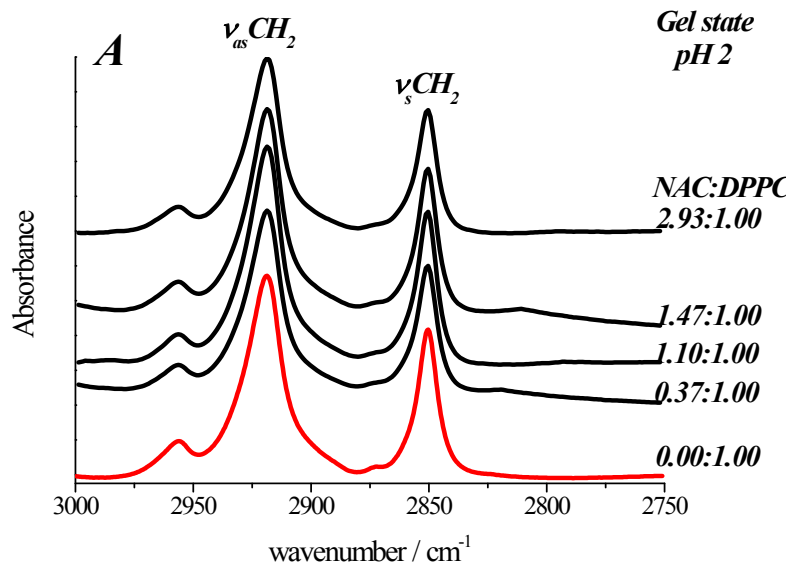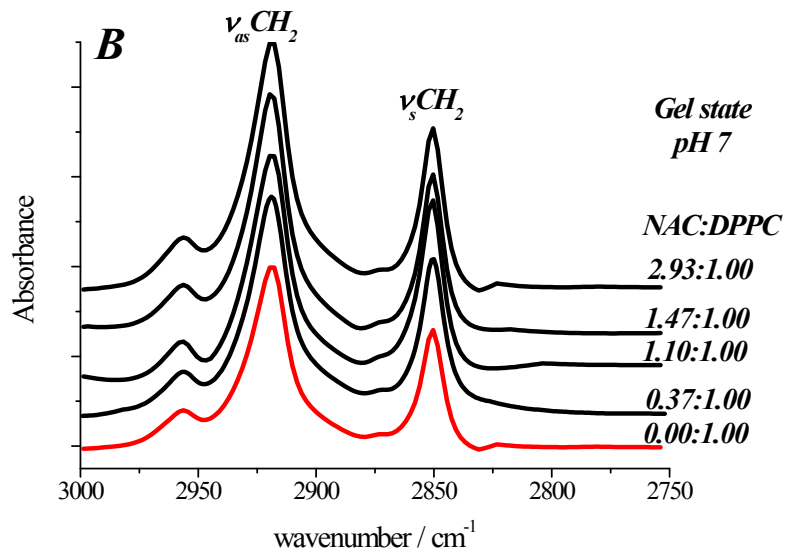

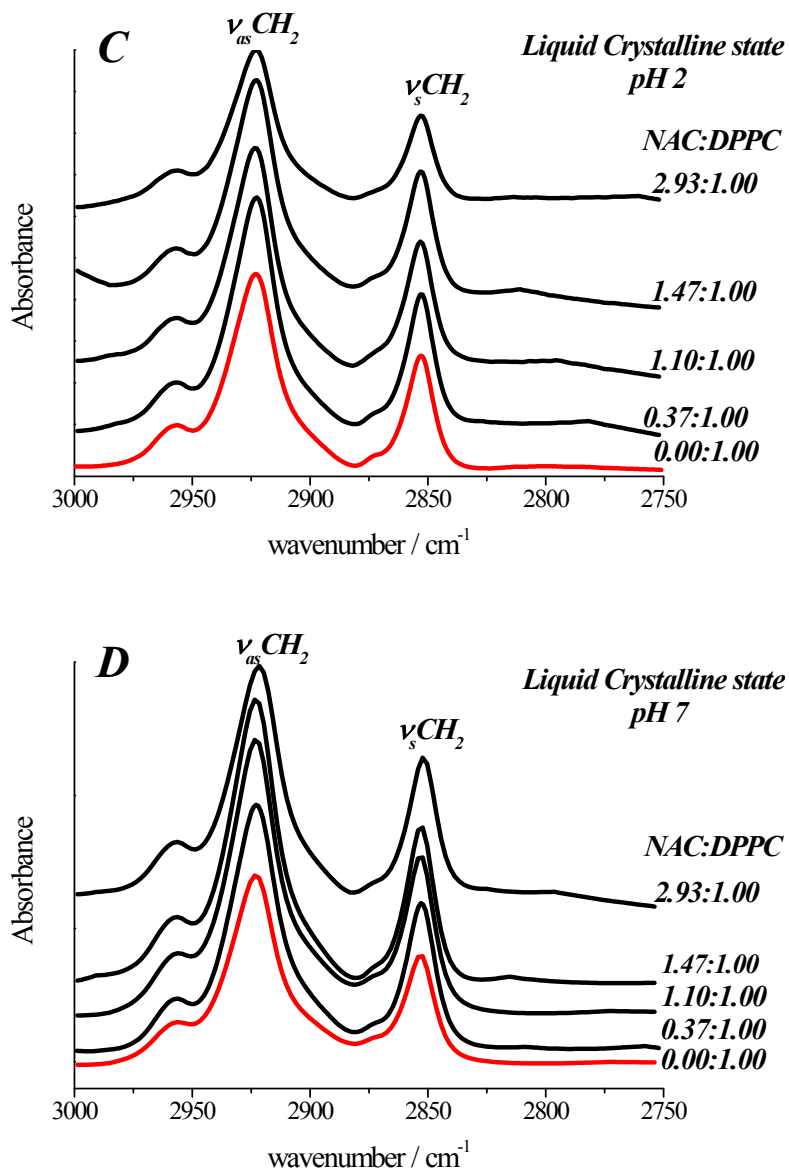

**Figure S2.** FTIR spectra for the stretching modes of the  $\nu_{as}CH_2$  and  $\nu_sCH_2$  groups, for pure DPPC and NAC:DPPC (all molar ratio), in the gel (A;B) and liquid crystalline (C;D) states.

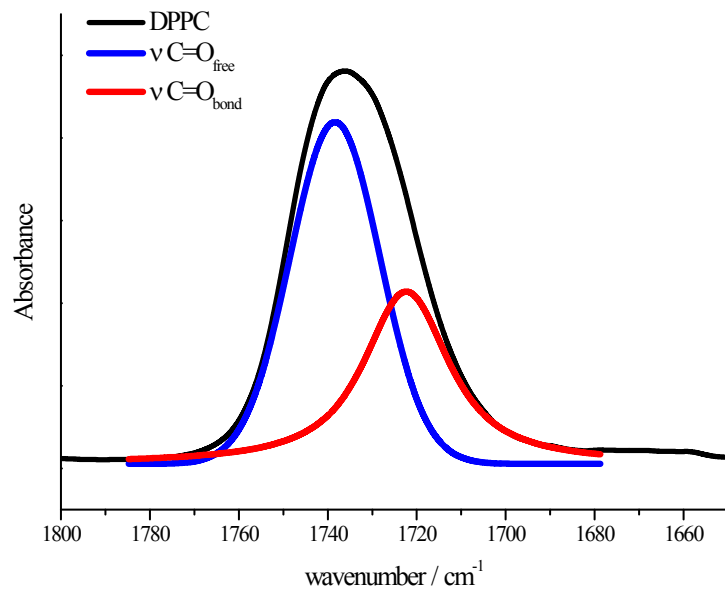

### A (pH 2)

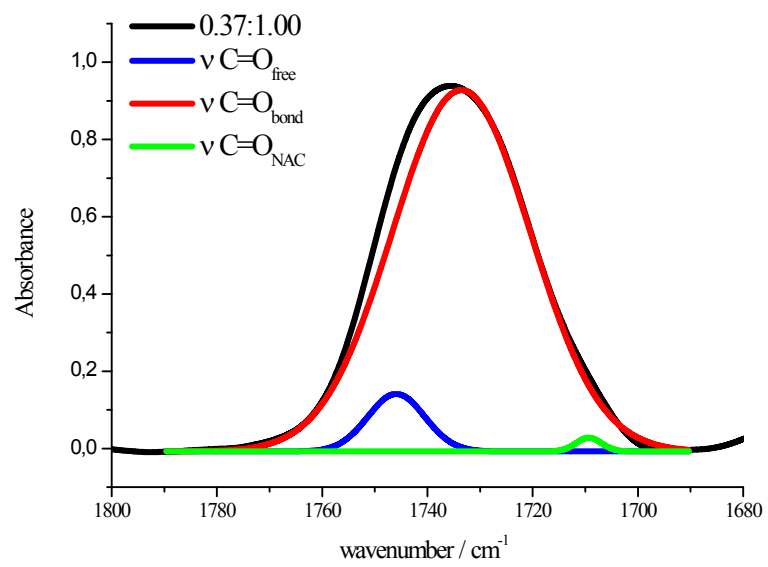

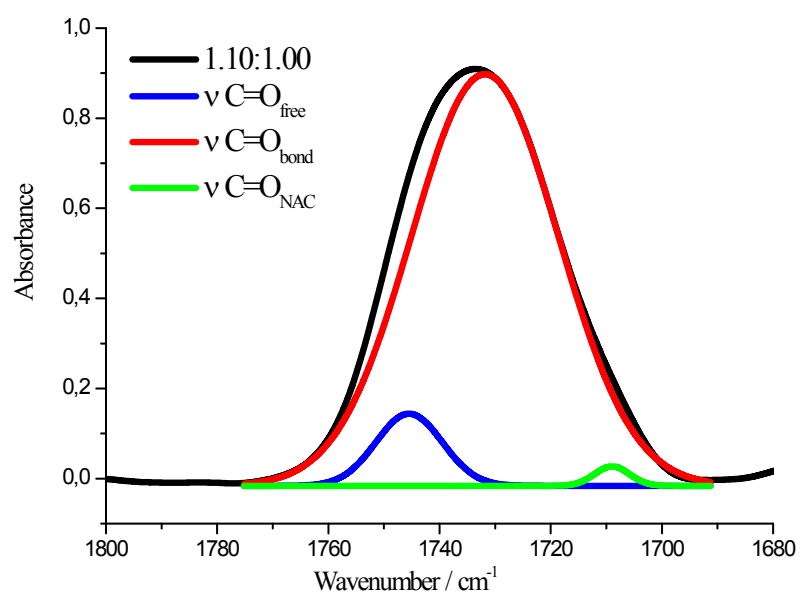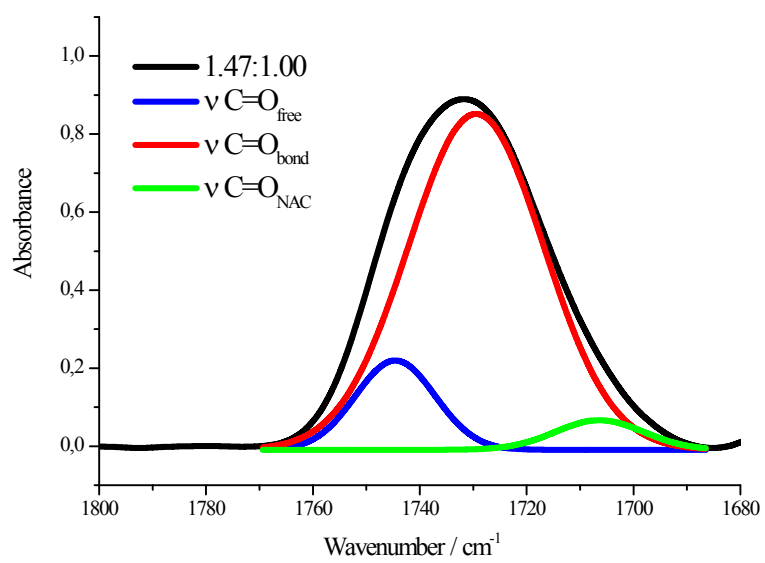



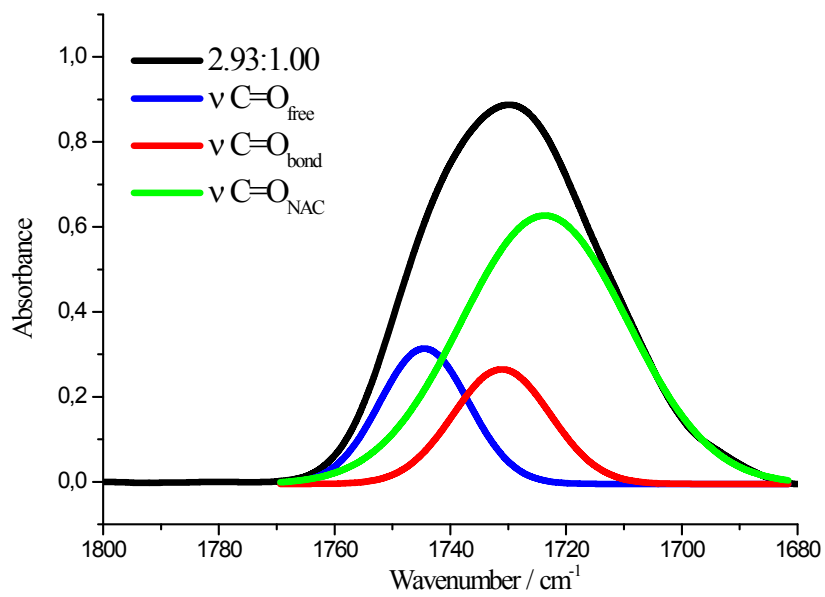

### B (pH 7)

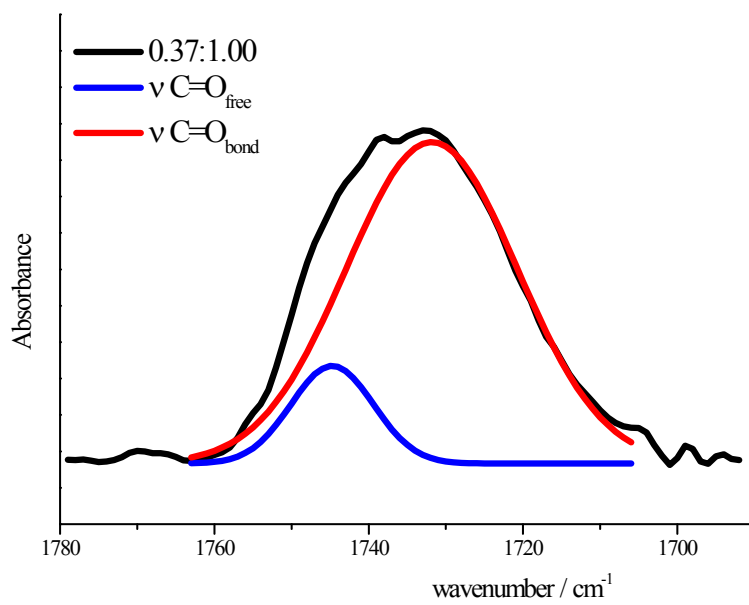

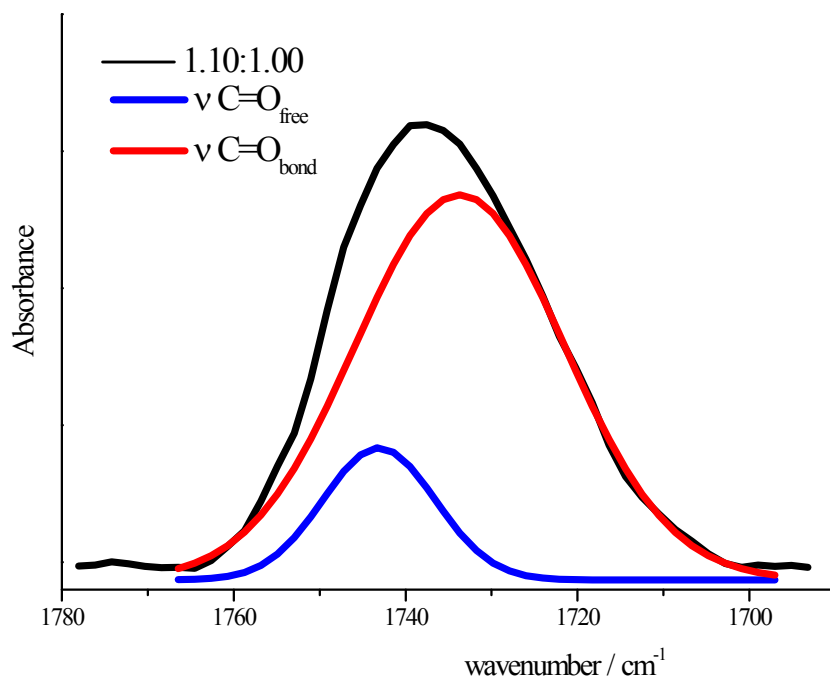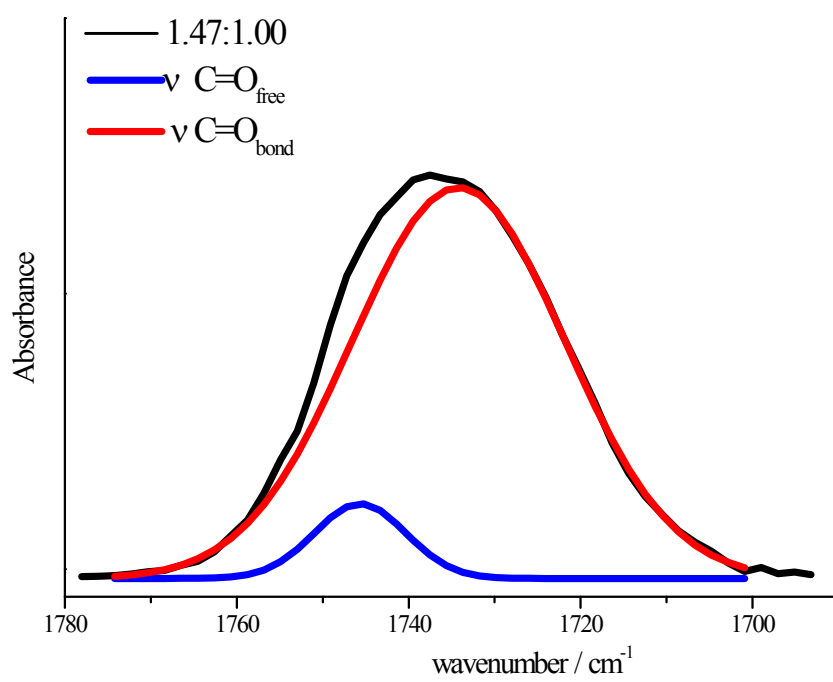

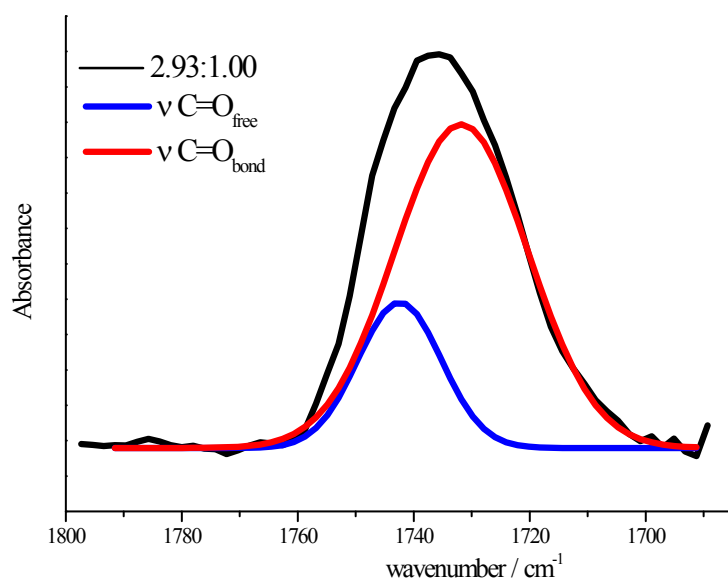

**Figure S3.** FTIR spectral bands of carbonyl groups of NAC: DPPC in gel state (30°C) at pH 2 (A) and pH 7 (B). The black line represents the contours of the spectra acquired and the blue and the red lines represent our estimates of the position and relative intensities of the component bands after deconvolution and fitting.

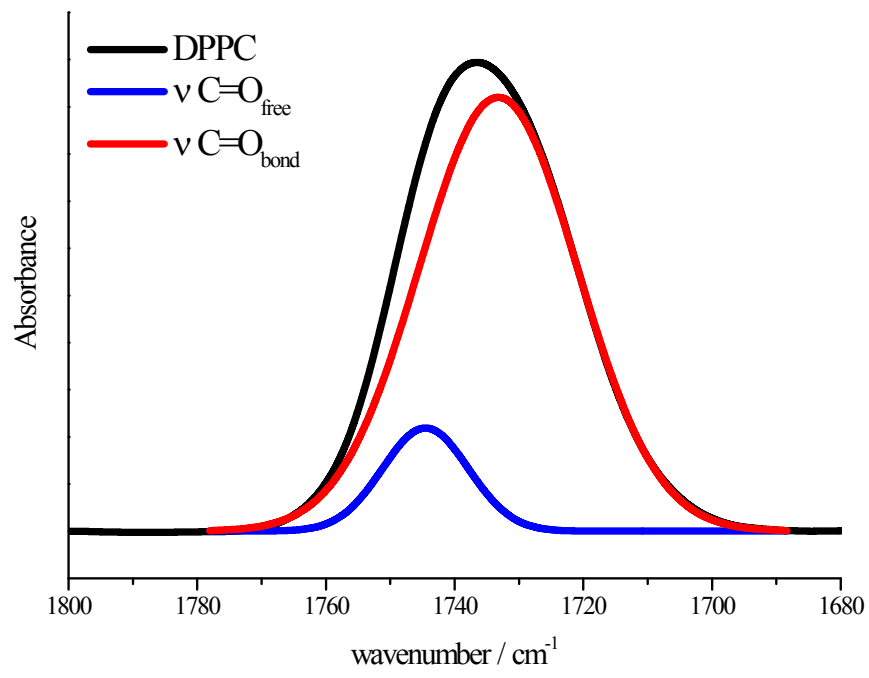

**A (pH 2)**

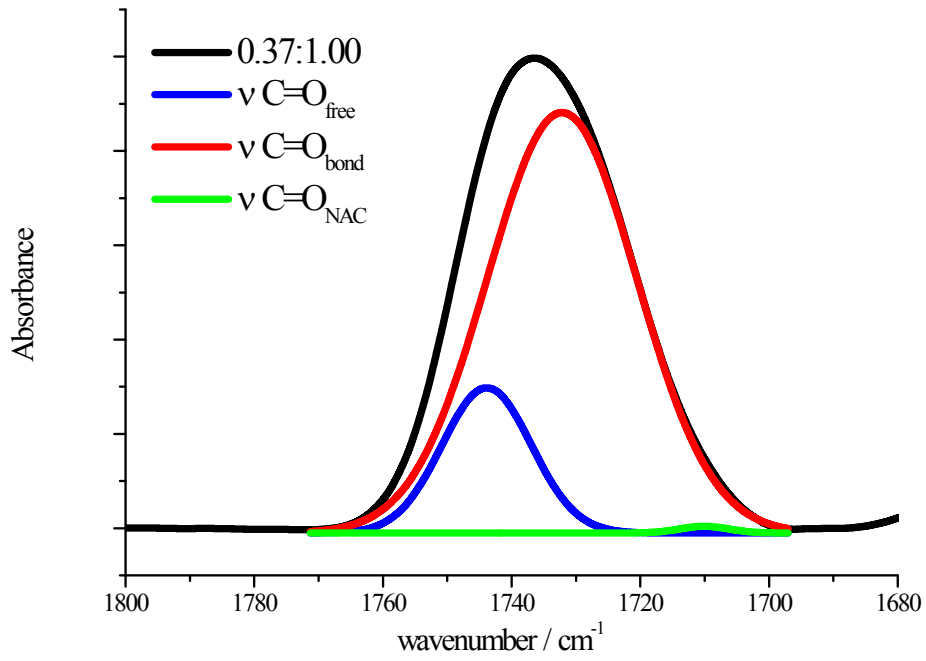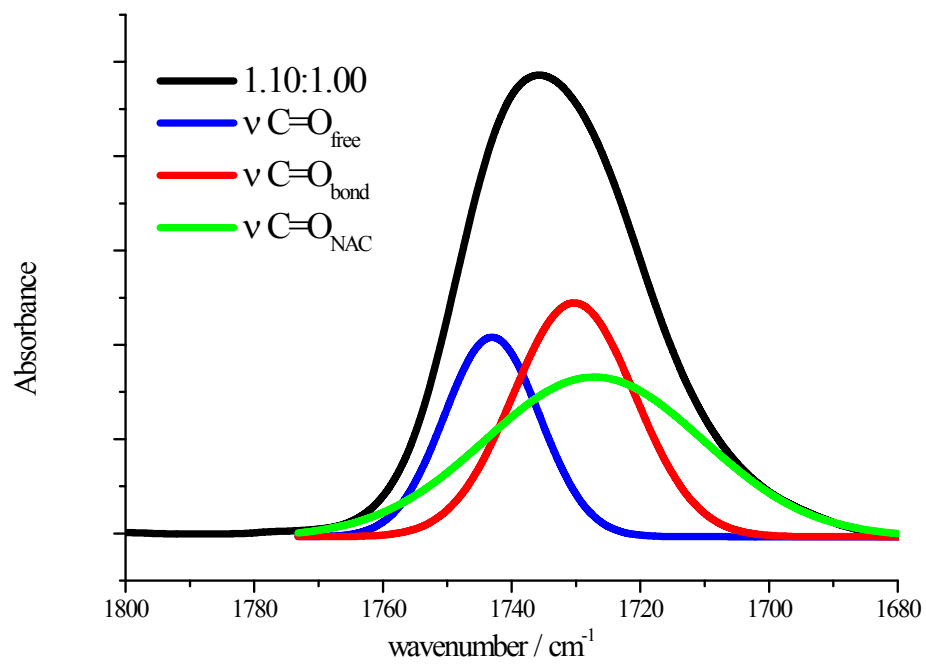

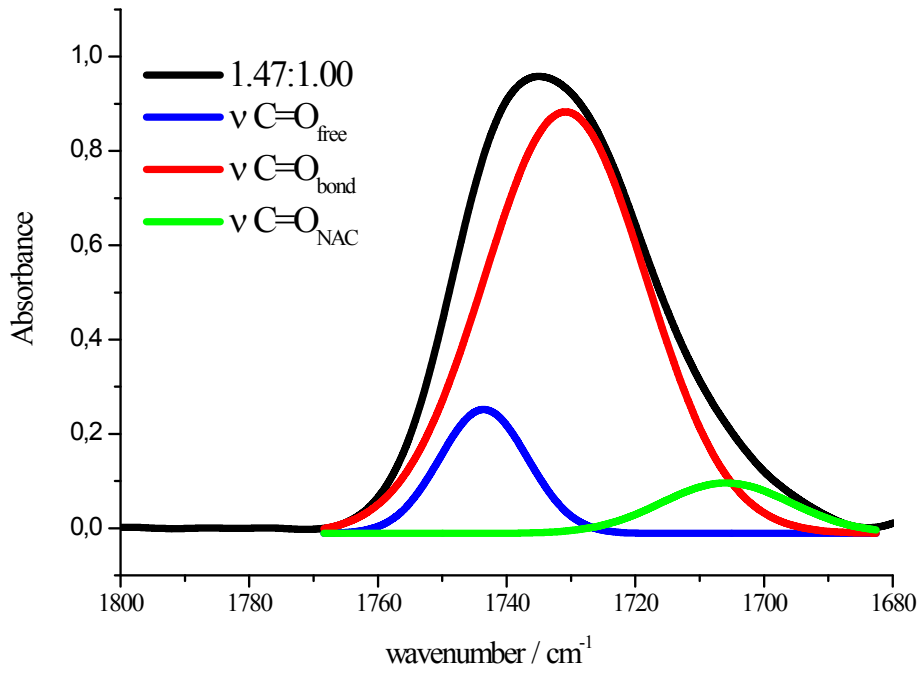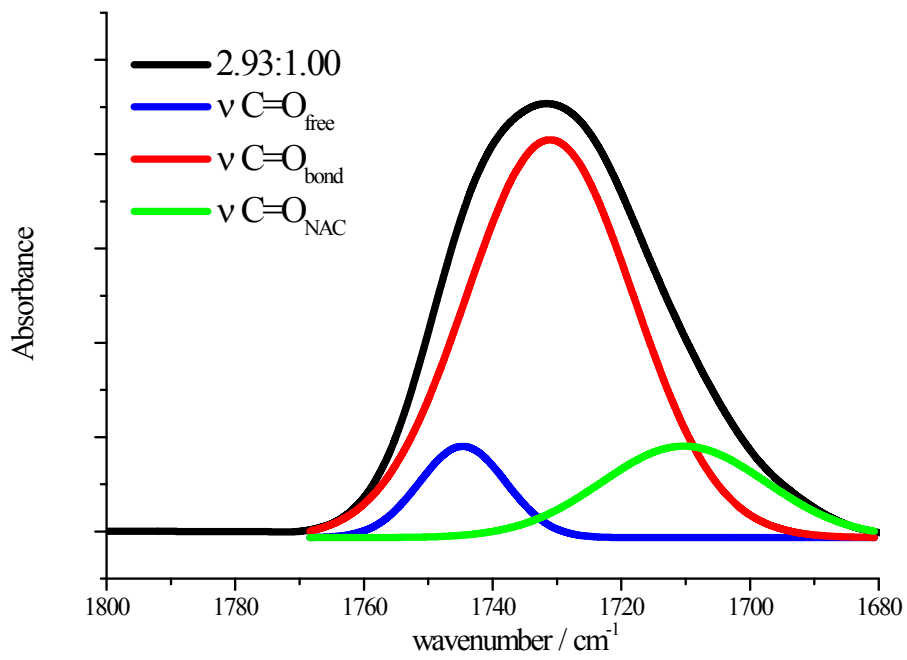

## B (pH 7)

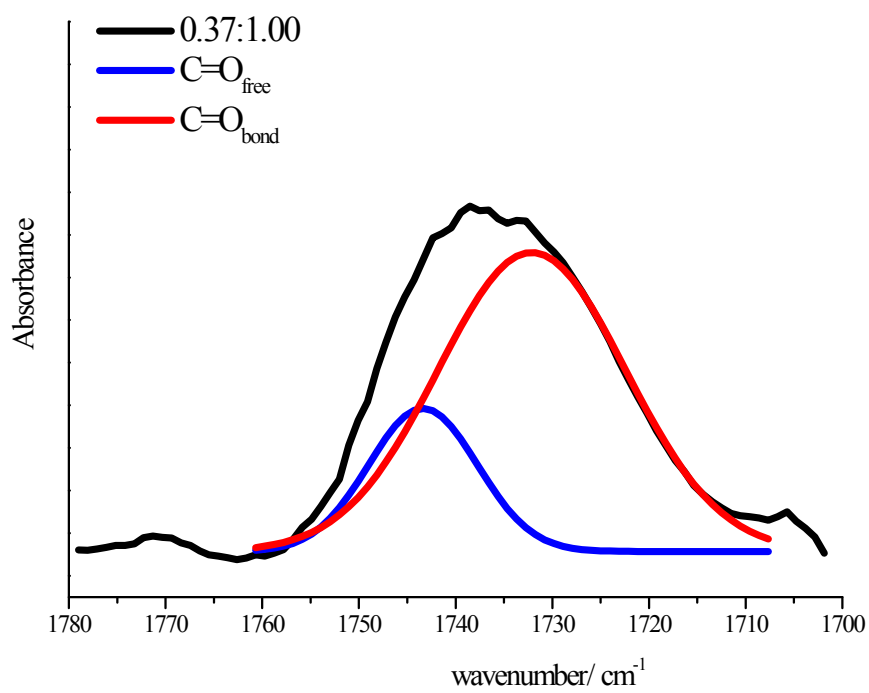

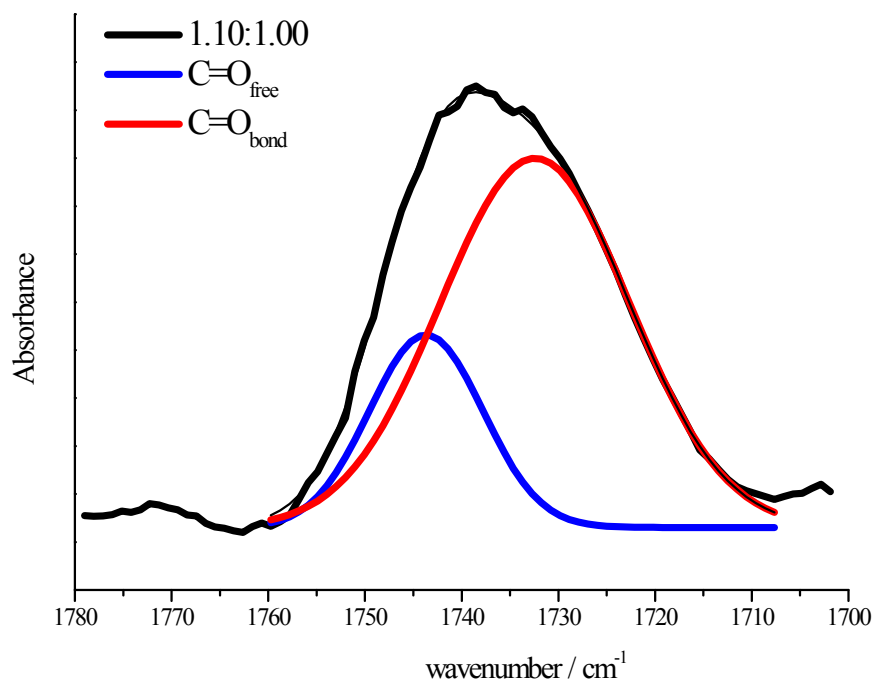



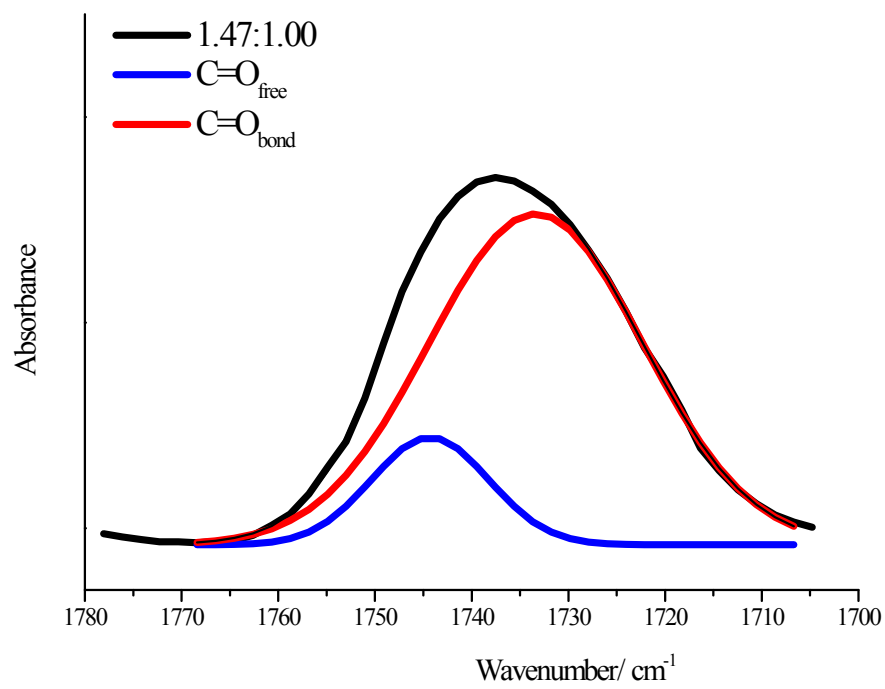

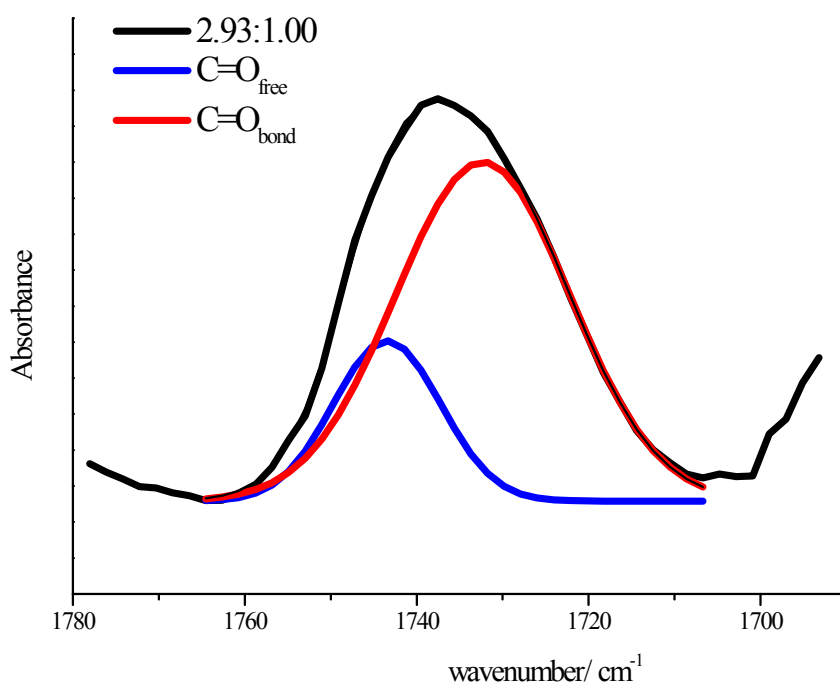

**Figure S4.** FTIR spectral bands of carbonyl groups of NAC: DPPC in liquid crystalline state (50°C) at pH 2 (A) and pH 7 (B). The black line represents the contours of the spectra acquired and the blue and the red lines represent our estimates of the position and relative intensities of the component bands after deconvolution and fitting.

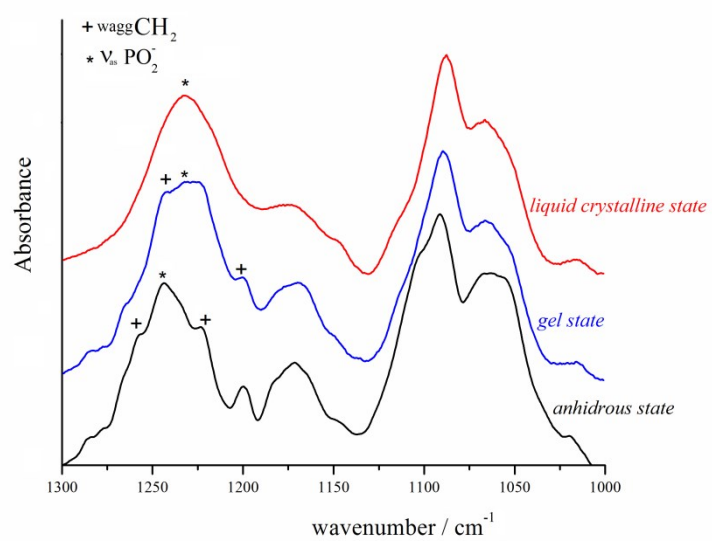

**Figure S5.** FTIR spectra corresponding DPPC liposomes lyophilized and hydrated in the region of the stretching mode of the phosphate group.

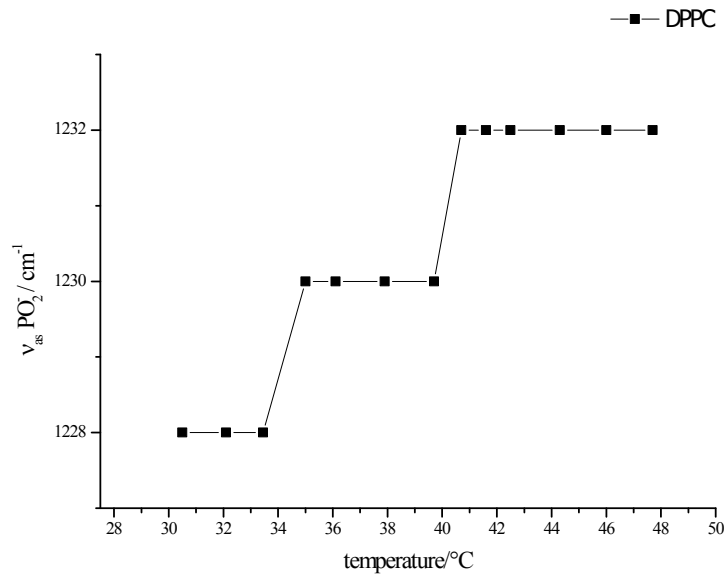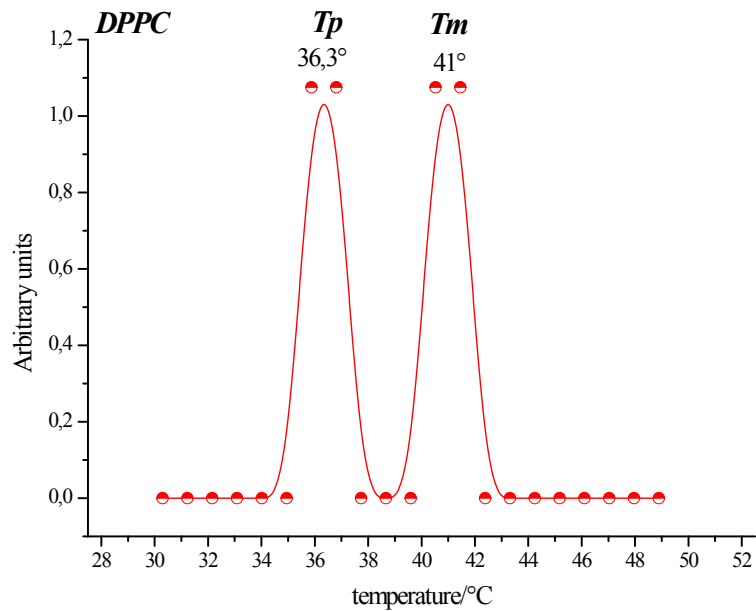

**Figure S6.** Wavenumbers vs temperature corresponding DPPC liposomes hydrated in the region of the asymmetric stretching mode of the phosphate group, from the FTIR spectra (upper). First derivative of the values of  $\nu_{as} PO_2$  versus temperature (down).
